# Supplementary material for: Diverse and Stable Male Sterile Tropical Asian Maize Hybrids Reveal Grain Yield Increases
Source: Research Square preprint supplement (doi:10.21203/rs.3.rs-7582507/v1), 2025-09-29
Supplement: Supplementary file 1 [file 94b5f3b04efeb556bcab87c3.docx]

**Supplementary Table 1. ANOVA of ITS2 across four locations in India and Nepal in 2024-25.**

| **Source of variation** | **df (for GY)** | **Mean Sum of squares** | |
| --- | --- | --- | --- |
| **GY (t ha-1)** | **SD (days)** |
| Environment (E) | 2 | 3.6** | 881.9** |
| Genotype (G) | 14 | 0.2 | 1.9 |
| GxE | 28 | 0.3 | 17.7** |
| Residuals | 45 | 1.1 | 3.6 |
| # Environments |  | 3 | 4 |

*, ** significant at 0.05 and 0.01 probability levels, respectively.

GY - Grain yield, SD – Silking Date

**Supplementary Table 2. ANOVA of HTS2 evaluated across three locations in India during the wet season of 2022.**

| **Sources of variation** | **df (for GY)** | **Mean Sum of Squares** | | |  |
| --- | --- | --- | --- | --- | --- |
| **GY (t ha-1)** | **AD (days)** | **SD (days)** | |
| Environment (E) | 2 | 1.96** | 5.73 | 0.99 | |
| Genotype (G) | 31 | 0.01 | <0.001 | <0.001 | |
| G x E | 62 | 0.24 | 1.11** | 0.92** | |
| Residuals | 96 | 0.93 | 1.28 | 0.93 | |
| # Environments |  | 3 | 2 | 2 | |

*, ** significant at 0.05 and 0.01 probability levels, respectively.

df – degrees of freedom, GY - Grain yield, AD – Anthesis Date, SD – Silking Date

**Supplementary Table 3. Specific combining ability effects of HTS3 for various traits.**

| **Hybrid Name** | **Line Number** | **Tester Number** | **Dry Season Managed Drought** | **Spring Season Heat Stress** | **Main Season Optimal** | **Dry season Irrigated** | **Across** | | |
| --- | --- | --- | --- | --- | --- | --- | --- | --- | --- |
| **GY (t ha-1)** | **GY (t ha-1)** | **GY (t ha-1)** | **GY (t ha-1)** | **GY (t ha-1)** | **SD (days)** | **FR (%)** |
| CMSH1 | PL1-CMSL1 | T1 | -0.18 | 0.46 | 0.71 | -0.06 | 0.11 | -0.32 | 4.48 |
| CMSH2 | PL1-CMSL1 | T2 | 0.17 | -0.35 | -0.71 | 0.10 | -0.08 | 0.37 | -4.48 |
| CMSH3 | PL1-CMSL2 | T1 | -0.12 | 0.03 | -0.74 | -0.28 | -0.26 | 0.55 | 5.10 |
| CMSH4 | PL1-CMSL2 | T2 | 0.11 | 0.09 | 0.74 | 0.31 | 0.30 | -0.50 | -5.10 |
| CMSH5 | PL1-CMSL3 | T1 | 0.06 | -0.35 | 0.79 | -0.07 | 0.04 | -0.06 | 7.14 |
| CMSH6 | PL1-CMSL3 | T2 | -0.07 | 0.46 | -0.79 | 0.11 | 0.00 | 0.11 | -7.14 |
| CMSH7 | PL1-CMSL4 | T1 | 0.86 | -0.25 | -0.02 | -0.13 | 0.05 | 0.12 | 7.13 |
| CMSH8 | PL1-CMSL4 | T2 | -0.87 | 0.37 | 0.02 | 0.16 | -0.02 | -0.08 | -7.13 |
| CMSH9 | PL1-CMSL5 | T1 | 0.14 | 0.25 | 0.13 | 0.37 | 0.31 | 0.16 | 5.64 |
| CMSH10 | PL1-CMSL5 | T2 | -0.15 | -0.13 | -0.13 | -0.33 | -0.27 | -0.12 | -5.64 |
| CMSH11 | PL1-CMSL6 | T1 | 0.44 | 0.50 | -1.34* | 0.00 | 0.02 | 0.09 | 4.16 |
| CMSH12 | PL1-CMSL6 | T2 | -0.45 | -0.39 | 1.34* | 0.03 | 0.01 | -0.04 | -4.16 |
| CMSH13 | PL1-CMSL7 | T1 | 0.10 | -0.07 | -0.16 | 0.27 | 0.14 | 0.24 | 8.39 |
| CMSH14 | PL1-CMSL7 | T2 | -0.11 | 0.19 | 0.17 | -0.24 | -0.10 | -0.19 | -8.39 |
| CMSH15 | PL1-CMSL8 | T1 | -0.41 | 0.24 | 0.26 | 0.05 | -0.03 | 0.25 | -2.25 |
| CMSH16 | PL1-CMSL8 | T2 | 0.40 | -0.12 | -0.26 | -0.02 | 0.07 | -0.20 | 2.25 |
| H1 | PL1 | T1 | -0.92 | -0.28 | 0.38 | -0.01 | -0.22 | -0.82* | -39.79** |
| H2 | PL1 | T2 | 0.91 | 0.40 | -0.38 | 0.04 | 0.25 | 0.87* | 39.79** |
| # locations |  |  | 2 | 1 | 1 | 4 | 8 | 6 | 7 |

*, ** significant at 0.05 and 0.01 probability levels

GY - Grain yield, SD – Silking Date, FR – Fertility Restoration Percentage
